# Supplementary material for: TP53/BRAF mutation as an aid in predicting response to immune-checkpoint inhibitor across multiple cancer types
Source: publisher site journal article supplement (doi:10.18632/aging.203980), 2022-03-27
Supplement: Supplementary file [file aging-v14i6-203980-supplementary-material-SD1.pdf]

**SUPPLEMENTARY FIGURES**

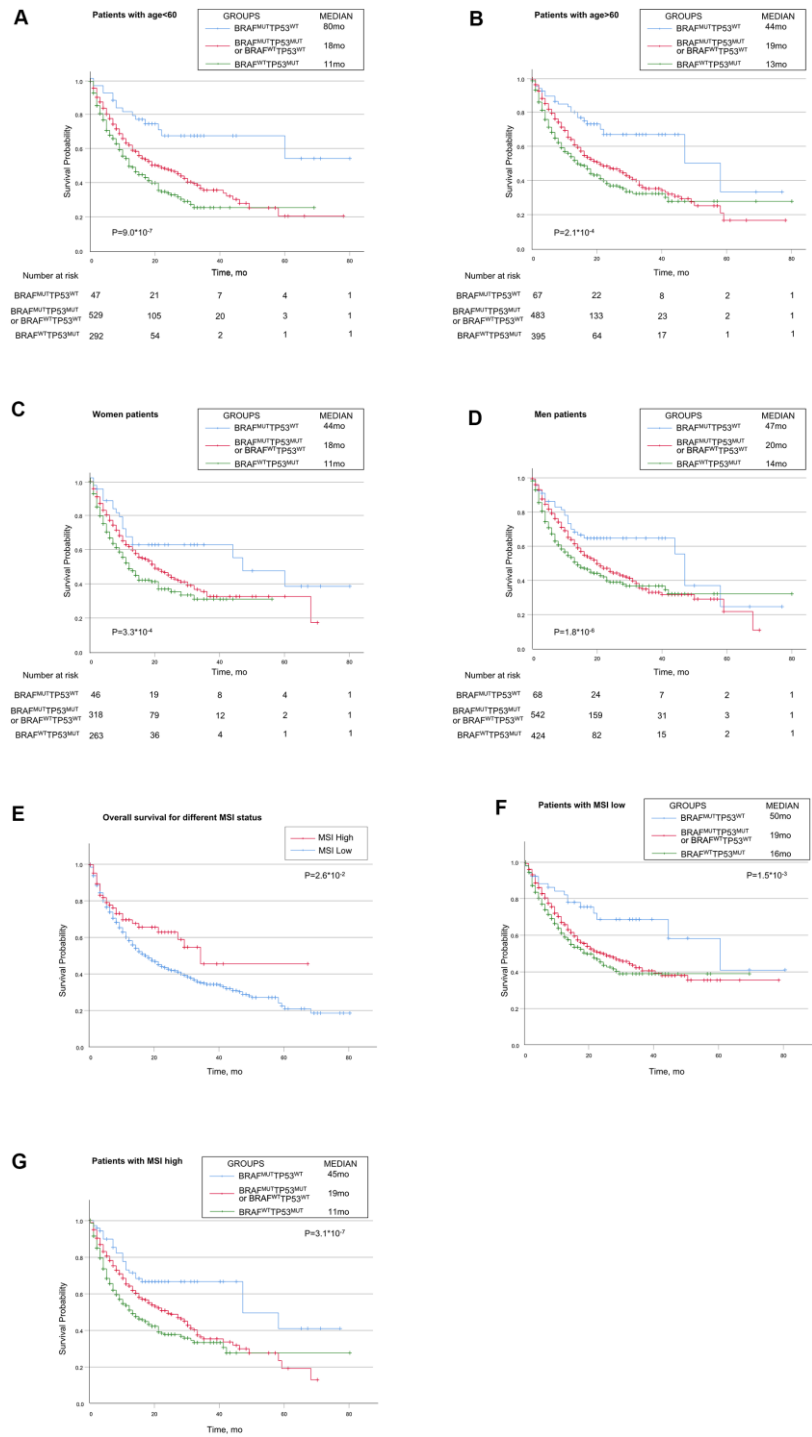

**Supplementary Figure 1.** Relationship between TP53 and BRAF Mutation Types and Prognosis in Patients Treated with Immune Checkpoint Inhibitors in Different Stratification of Clinical Parameters (A, B) Overall survival of different TP53/BRAF mutation types in different age groups (age<60 and >60). (C, D) Overall survival of different TP53/BRAF mutation types in different gender groups (women and men). (E) Patients in high-MSI status group had longer OS than patients in low-MSI status group. (F, G) Overall survival of different TP53/BRAF mutation types in high/low MSI groups.

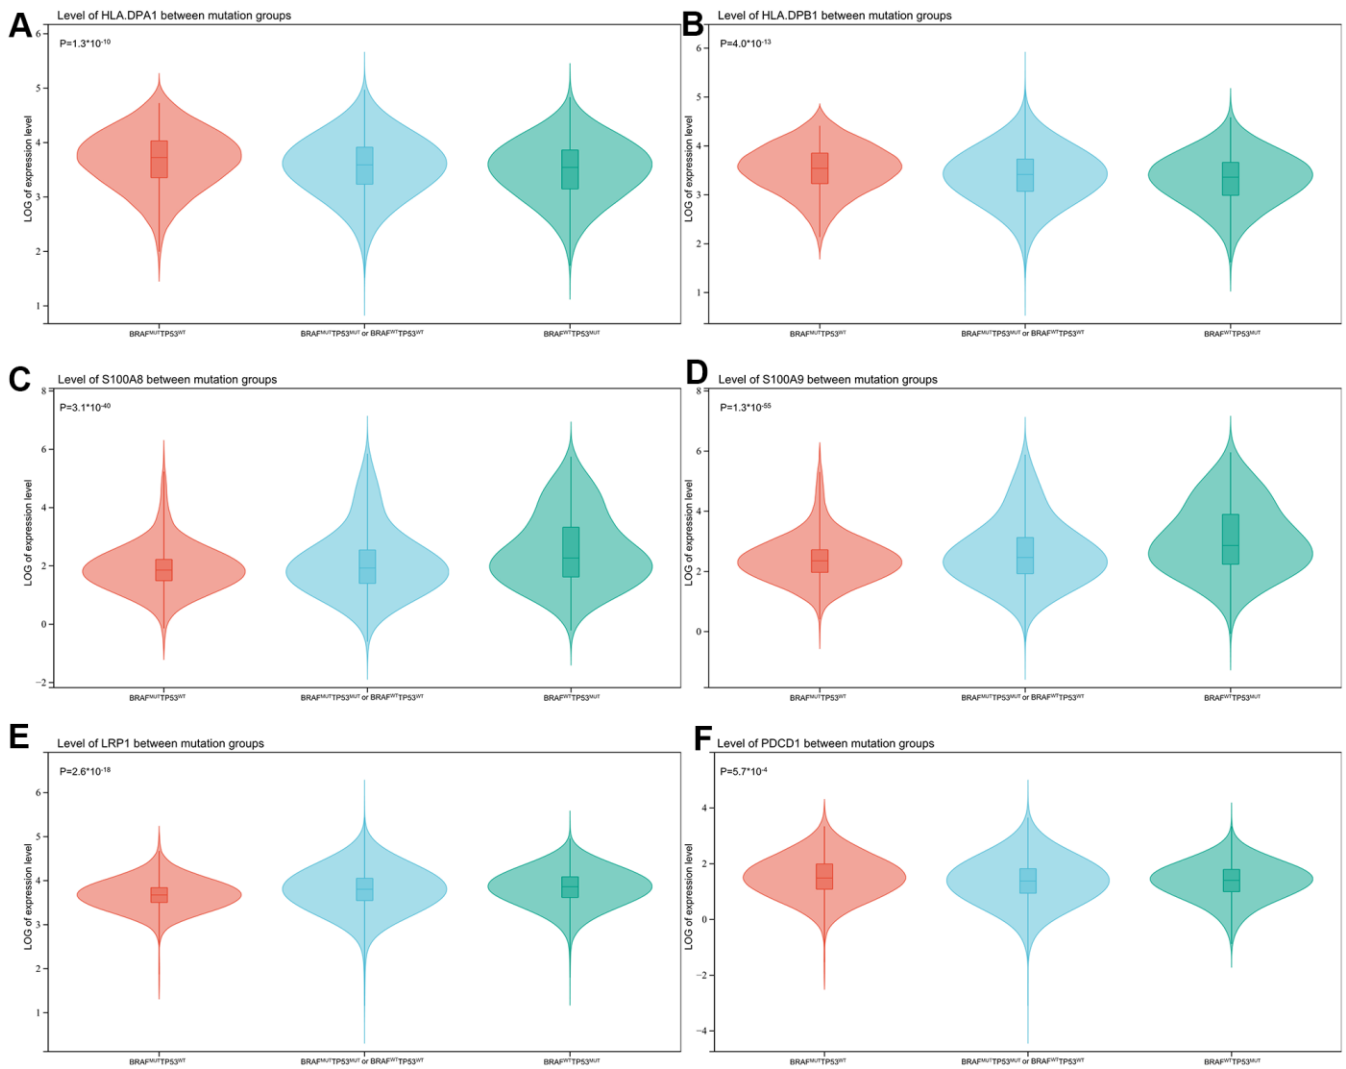

**Supplementary Figure 2.** Associations of TP53 and BRAF Mutation Types and Immune-related Genes (A–F) TP53/BRAF mutation model was significantly related to the expression of immune-related genes, that include myeloid-derived suppressor cells (MDSC), major histocompatibility complex (MHC), and immune checkpoints related genes.
